# Supplementary material for: In situ synthesis of a UIO-66-NH2@Ti3C2 composite for advanced electrochemical detection of acetaminophen
Source: Royal Society of Chemistry journal article supplement (doi:10.1039/d4nr04388j), 2025-01-01
Supplement: d4nr04388j1.pdf [file d4nr04388j1.pdf]

## Supplementary Material

### In-Situ Synthesis of UIO-66-NH<sub>2</sub>@Ti<sub>3</sub>C<sub>2</sub> Composite for Advanced Electrochemical Detection of Acetaminophen

Muhammad Hussnain Afzal<sup>1</sup>, Wajeeha Pervaiz<sup>2</sup>, Zhuo Huang<sup>3</sup>, Zhengyun Wang<sup>1</sup>, Guangfang Li<sup>1\*</sup>, Hongfang Liu<sup>1\*</sup>

[1] Hubei Key Laboratory of Material Chemistry and Service Failure, Key Laboratory of Material Chemistry for Energy Conversion and Storage (Ministry of Education), Hubei Engineering Research Center for Biomaterials and Medical Protective Materials, School of Chemistry and Chemical Engineering, Huazhong University of Science and Technology, 1037 Luoyu Rd, Wuhan, China

[2] College of Food Science and Technology, Huazhong Agricultural University, 1 Shizishan Street, Wuhan, China

[3] Changjiang River Scientific Research Institute of Changjiang Water Resources Commission, 289 Huangpu Street, Wuhan, Hubei, China

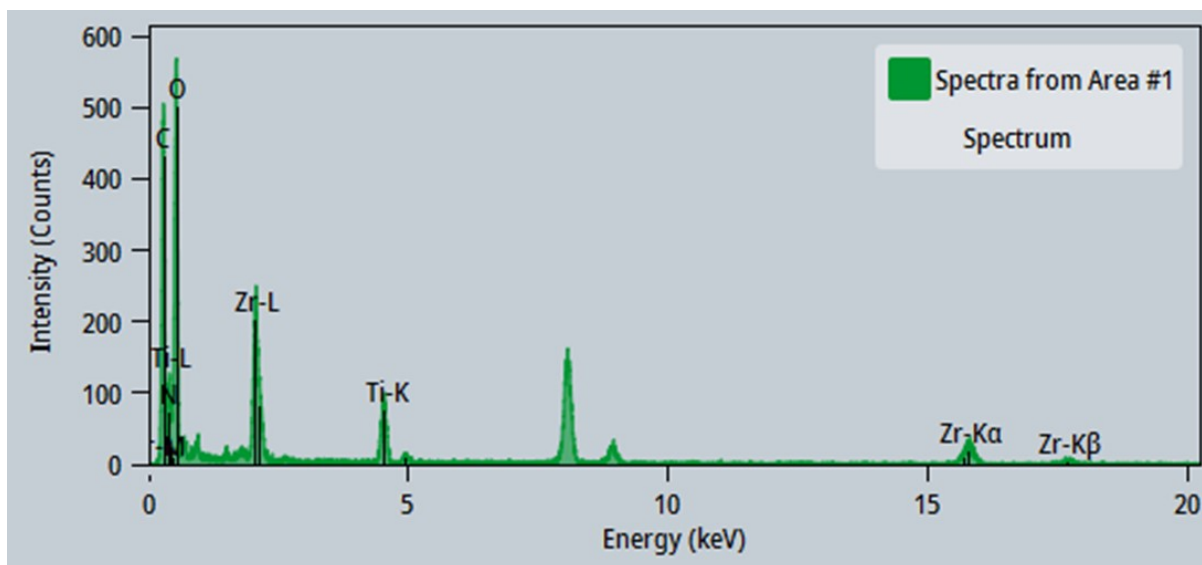

Fig. S1. (A) EDX spectrum of UN@Ti<sub>3</sub>C<sub>2</sub>-C

**Table S1.** Elemental relative atomic concentration

| Elements       | Atomic Fraction (%) |
|----------------|---------------------|
| Carbon (C)     | 52.00               |
| Nitrogen (N)   | 6.15                |
| Oxygen (O)     | 33.15               |
| Titanium (Ti)  | 3.38                |
| Zirconium (Zr) | 5.32                |

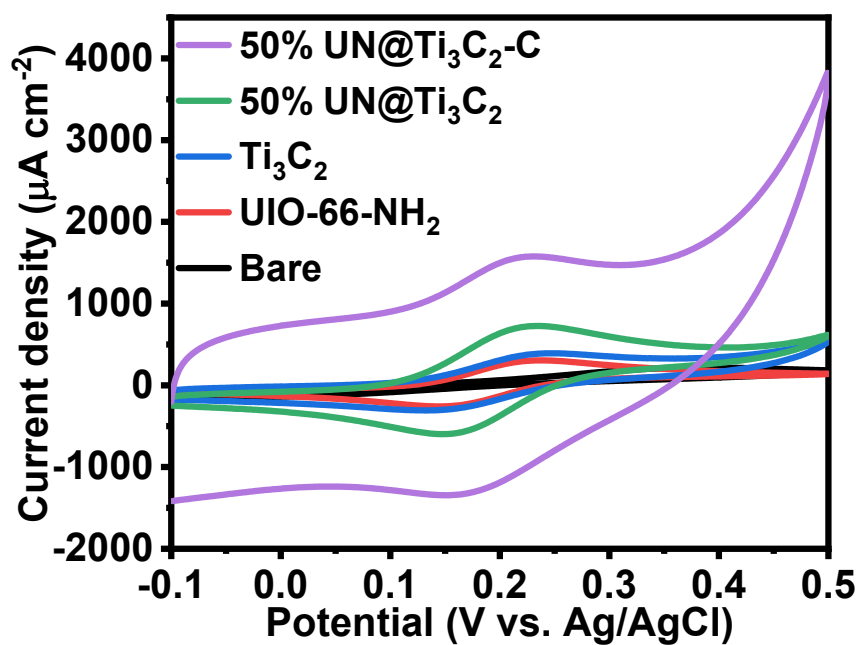

**Fig. S2.** Various fabricated electrodes CV records at -0.1-0.5 V potential range with 0.1 V/s scan rate in the 1 mM redox probe of  $[\text{Fe}(\text{CN})_6]^{3-/4-}$  with KCl of 0.1 M.

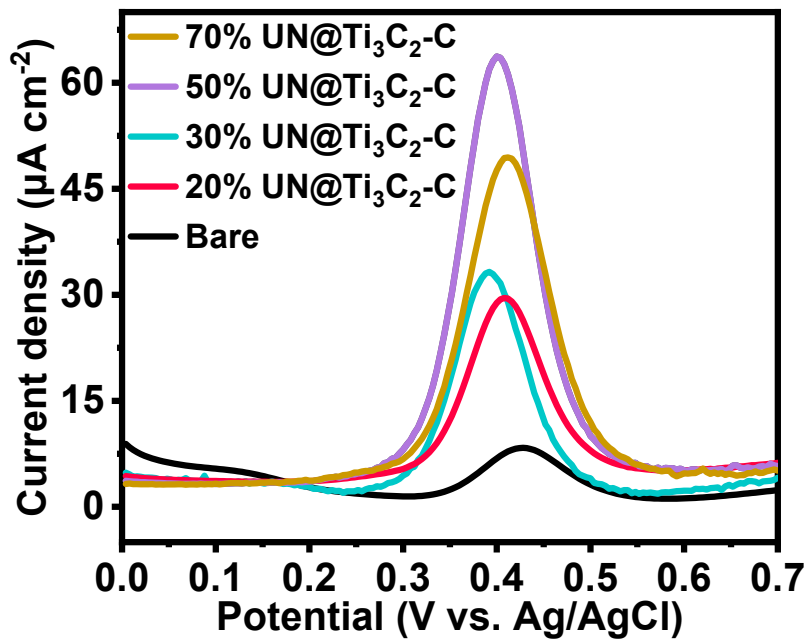

Fig. S3. DPV curves for varying Ti<sub>3</sub>C<sub>2</sub> contents in the UIO-66-NH<sub>2</sub> composite, recorded in 0.1 M PBS with 48 µM AP.

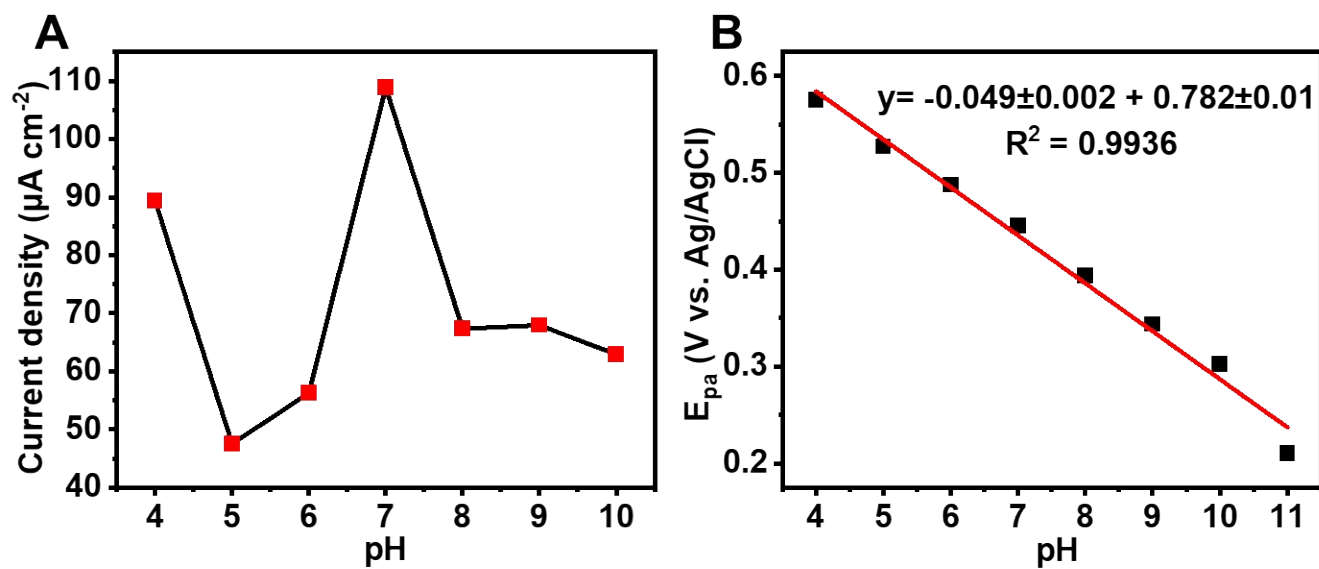

Fig. S4. (A) Corresponding change in the intensity of current with the change in pH value (0.1 M PBS, scan rate: 0.1 V/s), (B) Linear calibration plot between pH and E<sub>pa</sub> having 48µM AP.

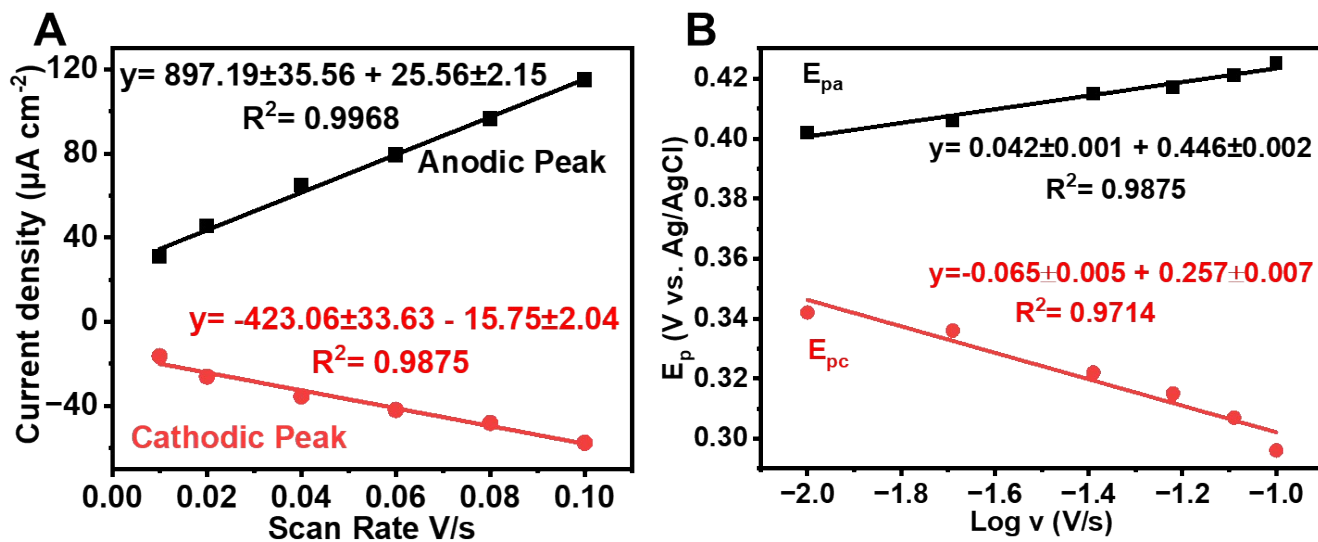

Fig. S5. (A) The plots of the anodic and cathodic peak current vs. the square root of the scan rate. (B) Linear fitting of the peak potential vs. log  $v/s$ .

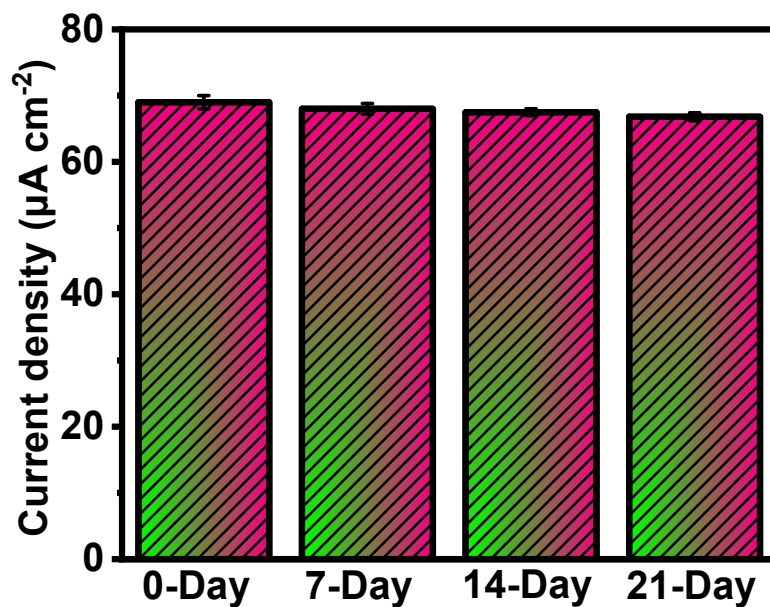

Fig. S6. The long-term stability of 50% UN@Ti<sub>3</sub>C<sub>2</sub>-C
